# Supplementary material for: Design of efficient mono-aminosilane precursors for atomic layer deposition of SiO2 thin films
Source: Royal Society of Chemistry journal article supplement (doi:10.1039/c7ra02301d), 2017-01-01
Supplement: c7ra02301d1.pdf [file c7ra02301d1.pdf]

## Design of Efficient Mono-Aminosilane Precursors for Atomic Layer Deposition of SiO<sub>2</sub> Thin Films

Liang Huang<sup>\*ab</sup>, Bo Han<sup>b</sup>, Maohong Fan<sup>c</sup>, Hansong Cheng<sup>\*b</sup>

<sup>a</sup> The State Key Laboratory of Refractories and Metallurgy, Wuhan University of Science and Technology, Wuhan 430081, China

<sup>b</sup> Sustainable Energy Laboratory, Faculty of Material Science and Chemistry, China University of Geosciences (Wuhan), Wuhan 430074, China

<sup>c</sup> Department of Chemical and Petroleum Engineering, University of Wyoming, Laramie 82071, United States

Electronic Supplementary Information (ESI)

### **S1. The equations for calculating adsorption energy ( $\Delta E_{AD}$ ), reaction energy barrier ( $\Delta E_a$ ), reaction energy ( $\Delta E$ ) and desorption energy ( $\Delta E_{DE}$ )**

(1) The adsorption energy ( $\Delta E_{AD}$ ) was calculated using

$$\Delta E_{AD} = E_{Surf} + E_{Pr} - E_{AD}$$

where  $E_{AD}$  and  $E_{Surf}$  are the energies of the precursor-adsorbed and clean hydroxylated SiO<sub>2</sub>(001) surfaces, respectively, and  $E_{Pr}$  is the energy of the Si precursor.

(2) The reaction energy barrier ( $\Delta E_a$ ) was calculated using

$$\Delta E_a = E_{TS} - E_{AD}$$

where  $E_{TS}$  is the energy at the transition state.

(3) The reaction energy ( $\Delta E$ ), which is the energy difference between the adsorbed and reacted configurations, was calculated using

$$\Delta E = E_{RE} - E_{AD}$$

where  $E_{RE}$  is the energy of the reacted configuration with the by-product nearby. By definition of reaction energy ( $\Delta E$ ), an exothermic reaction has a negative value and an endothermic reaction has a positive value.

(4) The desorption energy ( $\Delta E_{DE}$ ) of by-product was calculated using

$$\Delta E_{DE} = E_{Surf+SiH_3} + E_{BP} - E_{RE}$$

where  $E_{Surf+SiH_3}$  is the energy of the reacted hydroxylated  $SiO_2$  (001) surfaces with  $SiH_3$  group nearby, and  $E_{BP}$  is the energy of by-product.

### S2. The bond dissociation energy(BDE) of Si–N bond in precursors.

The Si precursors were optimized in a  $20 \times 20 \times 20 \text{ \AA}^3$  vacuum box with a  $1 \times 1 \times 1$  Monkhorst-Pack grid k-point mesh in order to obtain the most favorable structures.

To calculate the bond dissociation energy (BDE) between the Si atom and N atom in the precursors, the precursors were divided into two ligands by breaking the Si–N bond while maintaining the molecular structures of the two ligands.

Obviously, bond dissociation energies of Si–N bond were larger than the adsorption energy of precursors, indicating that the precursors will not decompose in the gas phase between the estimated ALD window.

Table S1. The calculated adsorption energy ( $\Delta E_{AD}$ ), reaction energy barrier ( $\Delta E_a$ ), desorption energy ( $\Delta E_{DE}$ ) and bond dissociation energy (BDE) of Si–N bond

| Precursor | Energies (kcal/mol) |              |                 |            |
|-----------|---------------------|--------------|-----------------|------------|
|           | $\Delta E_{AD}$     | $\Delta E_a$ | $\Delta E_{DE}$ | BDE (Si–N) |
| DMAS      | 18.9                | 12.5         | 5.1             | 106.8      |
| DEAS      | 19.5                | 13.7         | 7.5             | 105.4      |
| DPAS      | 17.8                | 9.4          | 8.3             | 107.2      |
| DIPAS     | 18.8                | 10.9         | 8.1             | 100.1      |
| DSBAS     | 17.7                | 12.0         | 8.9             | 99.2       |
| DTBAS     | 16.2                | 13.5         | 8.7             | 95.6       |

### S3.Kinetic analysis for the dissociation of precursors on hydroxylated $SiO_2$ (001) surfaces.

The reaction rate constants ( $k$ ) for precursor's dissociation on hydroxylated  $SiO_2$  (001) surfaces at different temperatures (350- 800 K) were calculated using harmonic Transition State Theory (TST):

$$k = \frac{k_B T}{h} \frac{q_{TS}}{q_R} \exp(-E_a/k_B T) \quad (R1)$$

where  $k_B$  is the Boltzmann constant,  $h$  is the Planck constant,  $T$  is the absolute temperature,  $E_a$  is the zero-point-corrected energy difference between the transition state and the initial reactant.

For partition functions,  $q$ , we only consider vibrational degrees of freedom for surface reactions, and they are calculated in the harmonic model, where  $\nu$  is the vibrational frequency.

$$q = \frac{1}{\prod_{i=1}^{Vibrations} (1 - \exp(-h\nu_i/k_B T))}$$

Table S2. The reaction rate constants ( $\ln k$ ) for precursor's dissociation on hydroxylated SiO<sub>2</sub> (001) surfaces at different temperatures (350- 800 K)

| Temperature | Rate constants ( $\ln k$ ) |       |       |        |       |       |       |
|-------------|----------------------------|-------|-------|--------|-------|-------|-------|
|             | DMAS                       | DEAS  | DPAS  | DIPAS  | DSBAS | DIBAS | DTBAS |
| 350 K       | 12.63                      | 12.24 | 16.26 | 14.92  | 7.24  | 6.40  | 6.88  |
| 375 K       | 13.81                      | 13.63 | 17.14 | 15.97  | 8.28  | 7.77  | 8.06  |
| 400 K       | 14.84                      | 14.84 | 17.90 | 16.88  | 9.18  | 8.96  | 9.08  |
| 425 K       | 15.75                      | 15.91 | 18.56 | 17.68  | 9.95  | 10.01 | 9.96  |
| 450 K       | 16.55                      | 16.86 | 19.14 | 18.39  | 10.63 | 10.94 | 10.74 |
| 475 K       | 17.26                      | 17.71 | 19.66 | 19.02  | 11.23 | 11.76 | 11.42 |
| 500 K       | 17.90                      | 18.47 | 20.12 | 19.57  | 11.76 | 12.49 | 12.03 |
| 525 K       | 18.47                      | 19.16 | 20.53 | 20.07  | 12.23 | 13.15 | 12.57 |
| 550 K       | 18.98                      | 19.78 | 20.89 | 20.52  | 12.64 | 13.75 | 13.05 |
| 575 K       | 19.45                      | 20.35 | 21.22 | 20.93  | 13.01 | 14.27 | 13.49 |
| 600 K       | 19.88                      | 20.87 | 21.52 | 21.30  | 13.35 | 14.77 | 13.88 |
| 625 K       | 20.27                      | 21.34 | 21.79 | 21.63  | 13.65 | 15.22 | 14.23 |
| 650 K       | 20.63                      | 21.78 | 22.04 | 21.94  | 13.92 | 15.63 | 14.55 |
| 675 K       | 20.95                      | 22.18 | 22.26 | 22.22  | 14.16 | 16.00 | 14.84 |
| 700 K       | 21.26                      | 22.55 | 22.47 | 22.471 | 14.38 | 16.35 | 15.11 |
| 725 K       | 21.53                      | 22.90 | 22.65 | 22.71  | 14.58 | 16.66 | 15.35 |
| 750 K       | 21.79                      | 23.22 | 22.82 | 22.93  | 14.76 | 16.96 | 15.57 |
| 775 K       | 22.03                      | 23.52 | 22.98 | 23.12  | 14.93 | 17.23 | 15.78 |
| 800 K       | 22.25                      | 23.79 | 23.13 | 23.31  | 15.08 | 17.48 | 15.96 |
| 825 K       | 22.46                      | 24.05 | 23.26 | 23.48  | 15.22 | 17.71 | 16.14 |
| 850 K       | 22.65                      | 24.29 | 23.38 | 23.64  | 15.34 | 17.93 | 16.29 |

**S3.The optimized structures of DMAS, DEAS, DPAS, DIPAS, DSBAS, and DTBAS.**

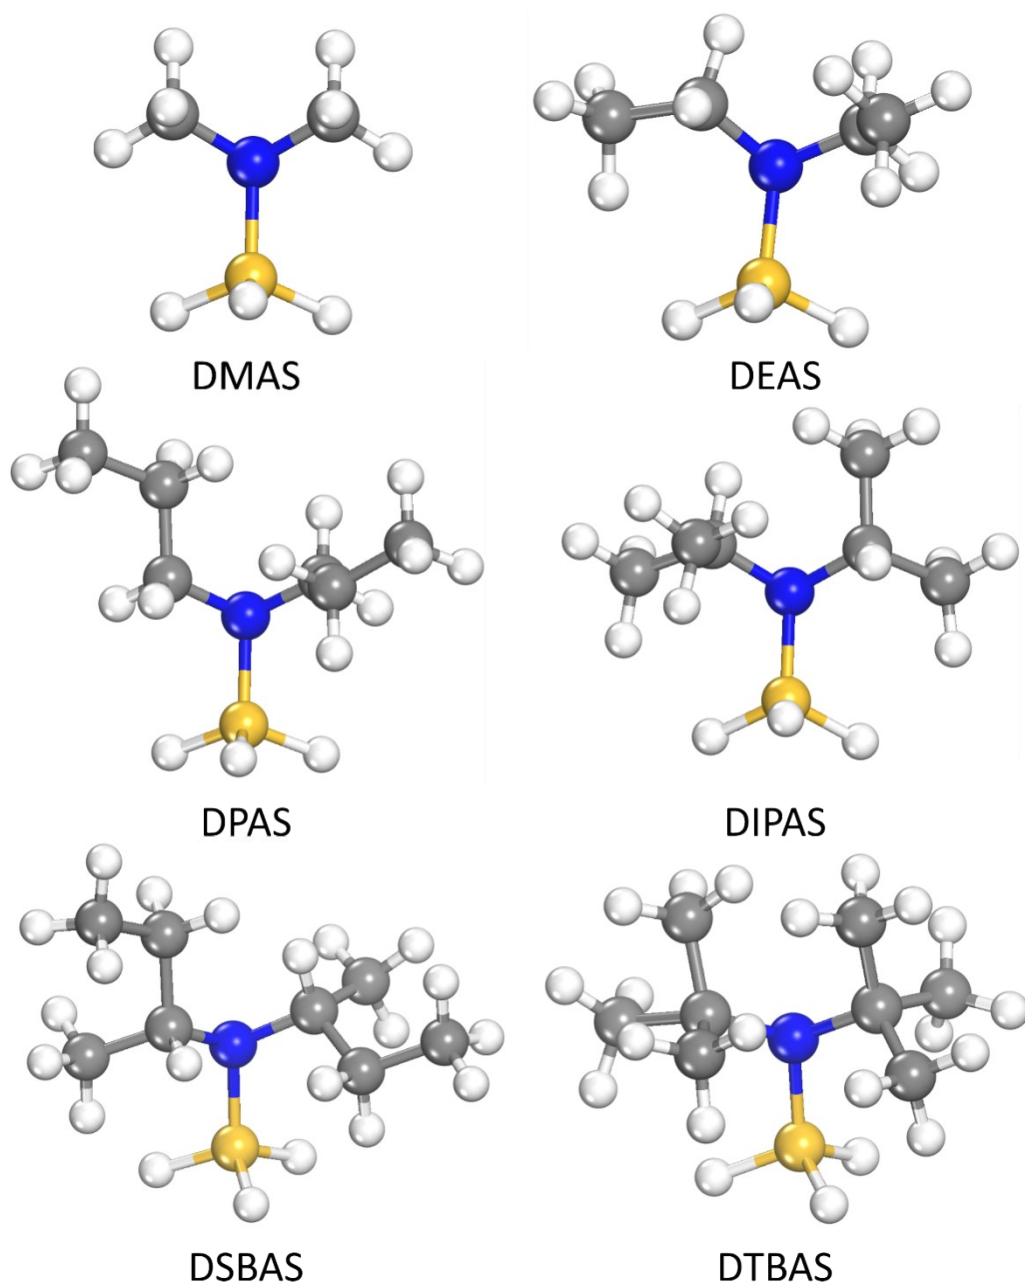

Fig S1.The optimized structures of DMAS, DEAS, DPAS, DIPAS, DSBAS, and DTBAS.

**S4. The optimized structures, main structural parameters and energy variation for the dissociative reaction of precursors on hydroxylated SiO<sub>2</sub> (001) surfaces.**

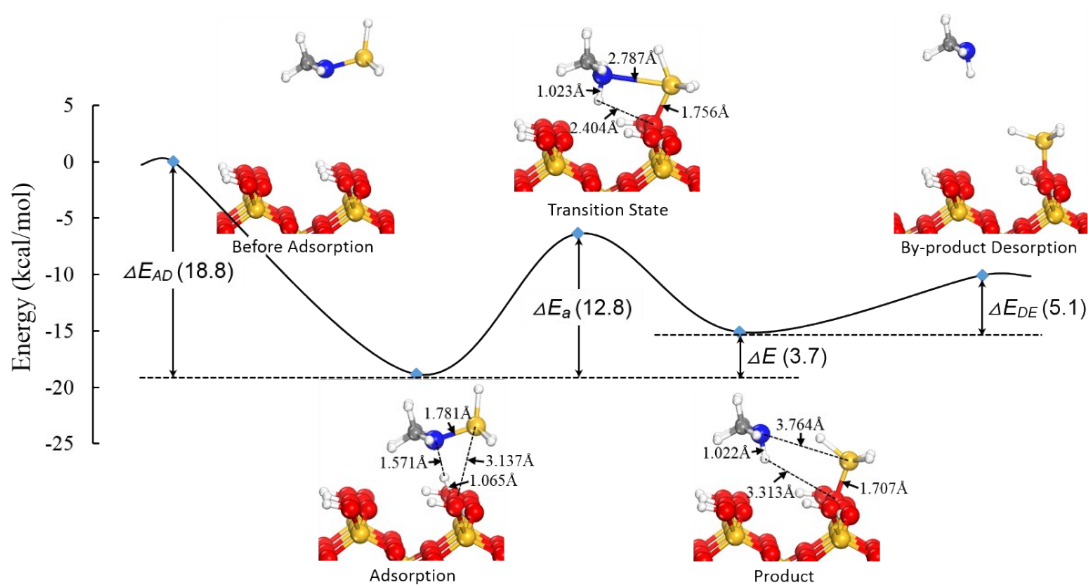

Fig S2. Energy variation for DMAS reaction with the hydroxylated SiO<sub>2</sub> (001) surface.

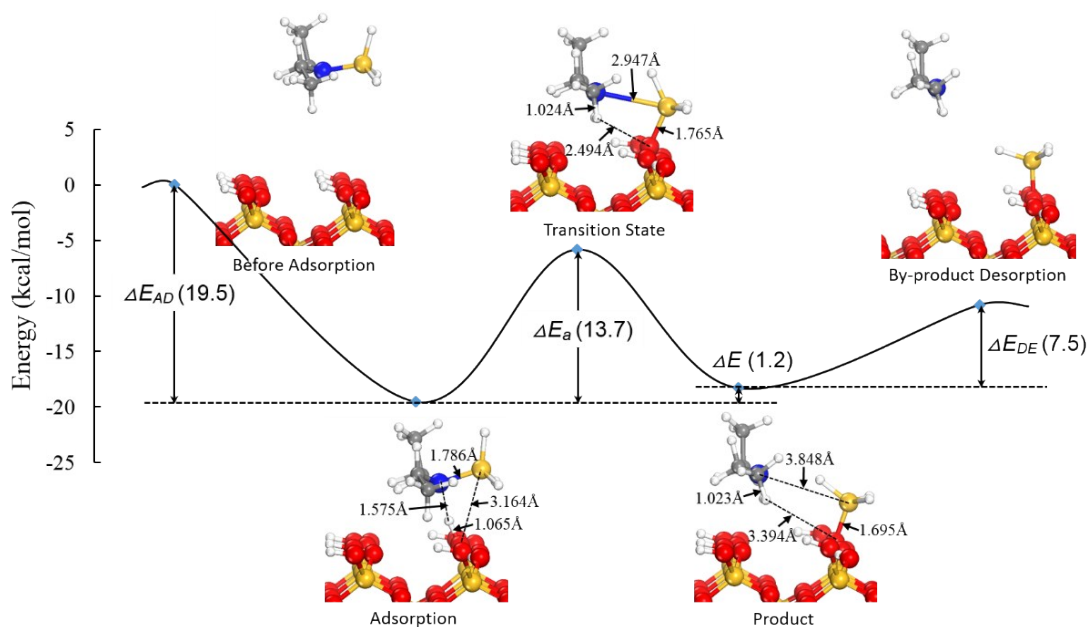

Fig S3. Energy variation for DEAS reaction with the hydroxylated SiO<sub>2</sub> (001) surface.

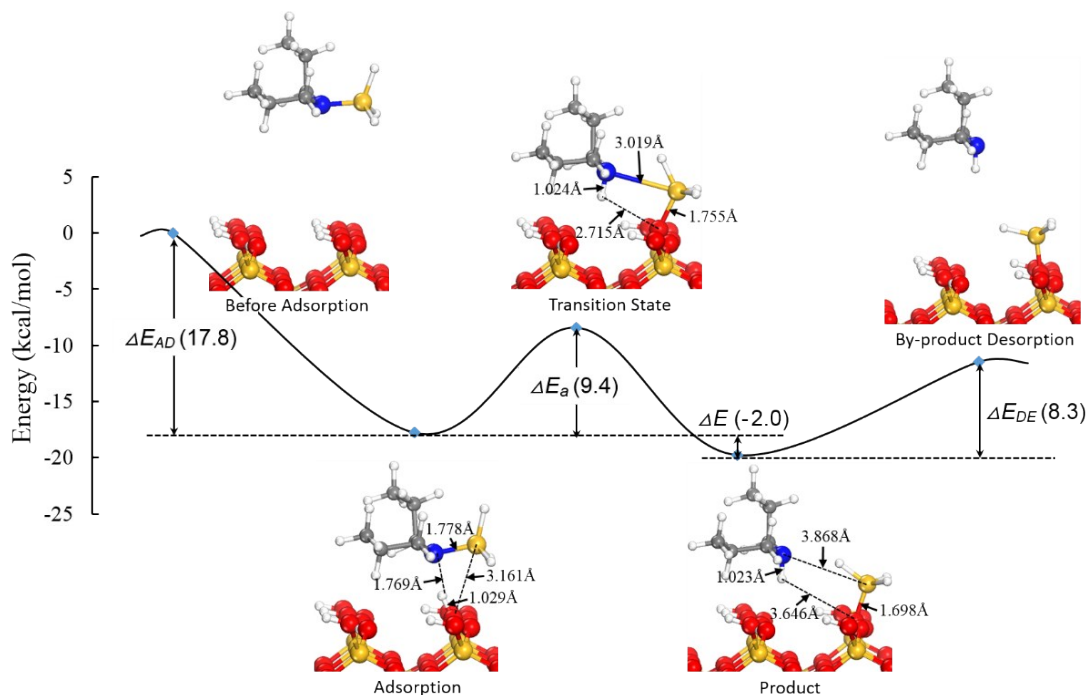

Fig S4. Energy variation for DPAS reaction with the hydroxylated  $\text{SiO}_2$  (001) surface.

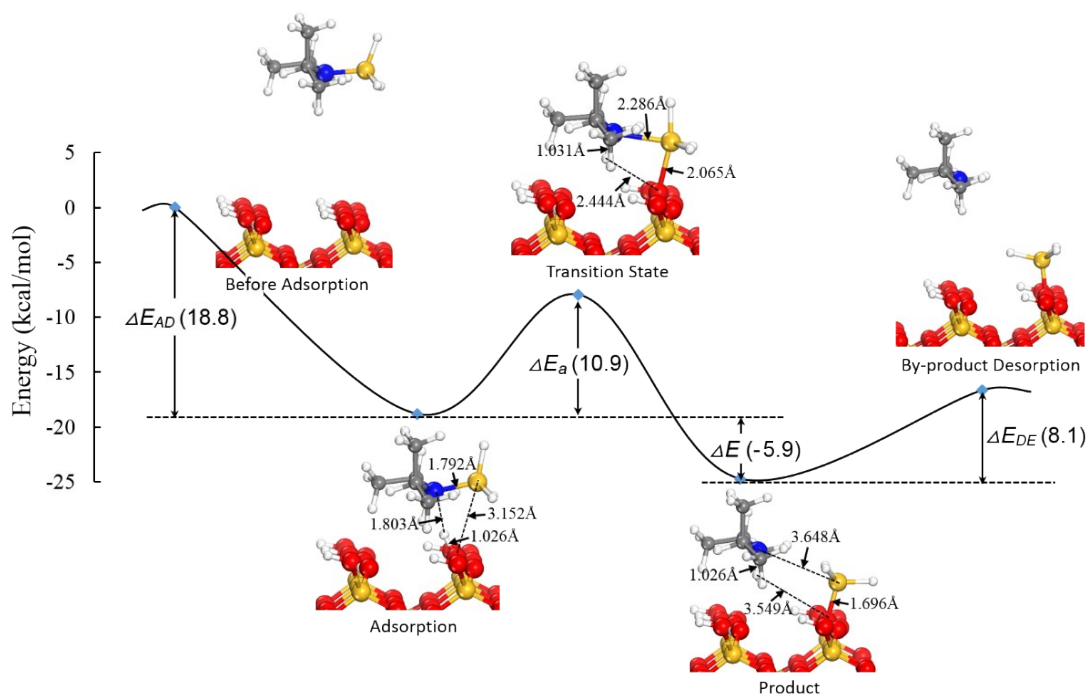

Fig S5. Energy variation for DIPAS reaction with the hydroxylated  $\text{SiO}_2$  (001) surface.

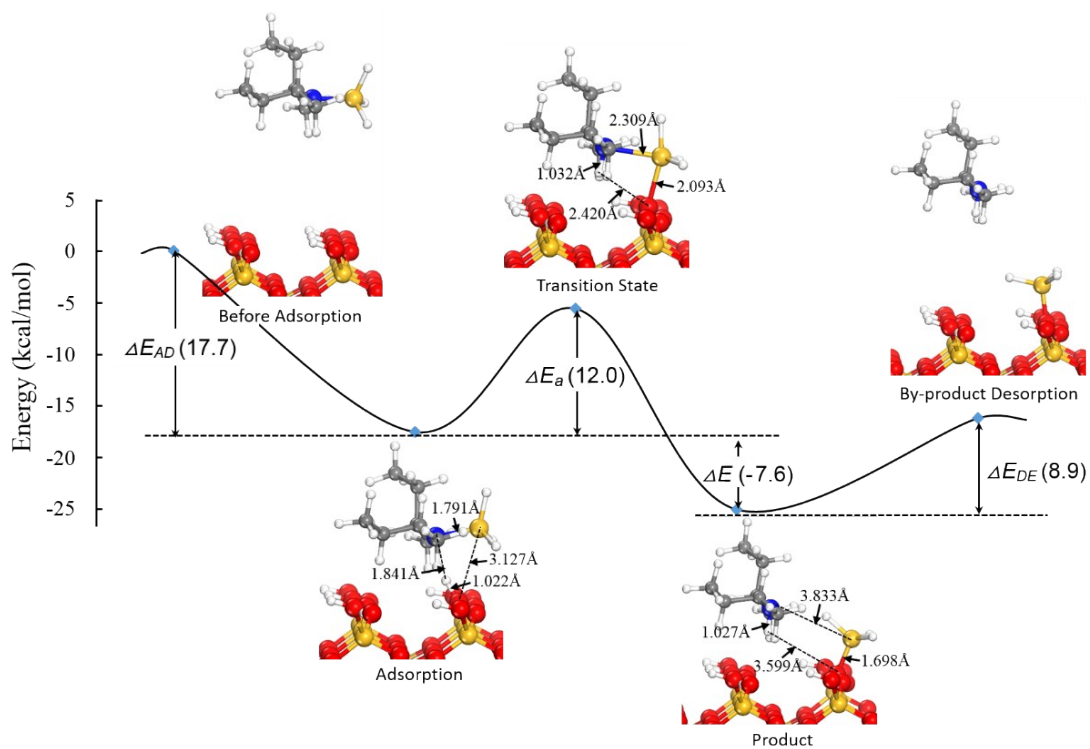

Fig S6. Energy variation for DSBAS reaction with the hydroxylated SiO<sub>2</sub>(001) surface.

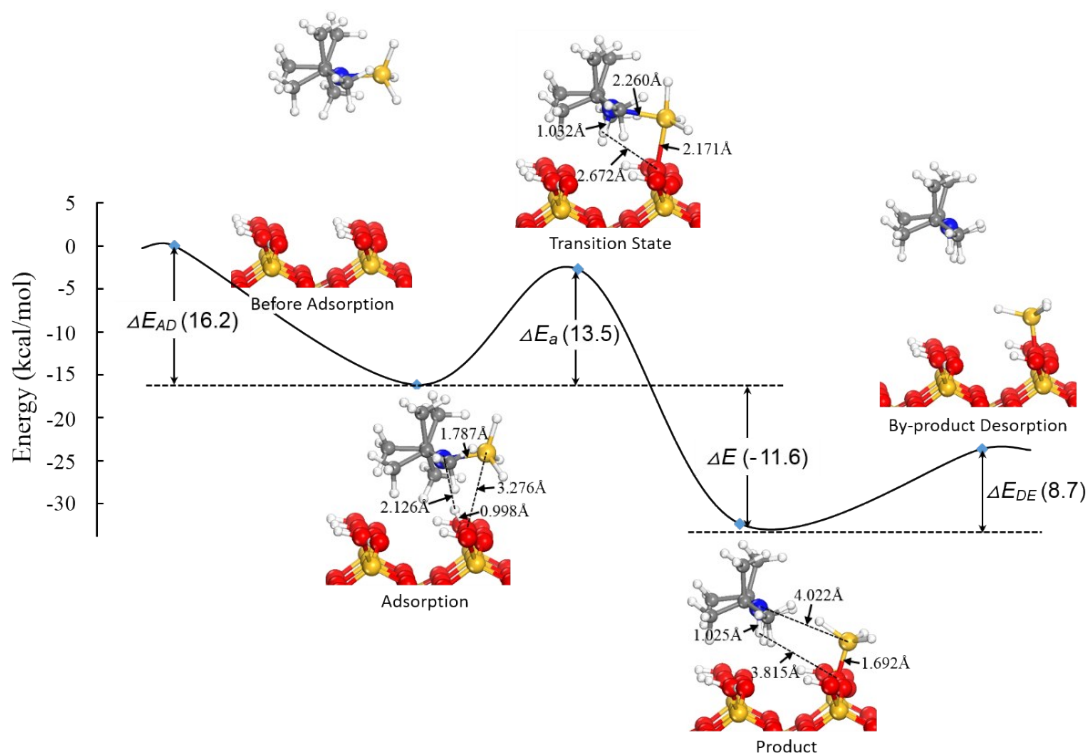

Fig S7. Energy variation for DTBAS reaction with the hydroxylated SiO<sub>2</sub>(001) surface.
